# Supplementary material
Source: HighWire-hosted journal article supplement (https://www.jpn.ca/highwire/filestream/89394/field_highwire_adjunct_files/0/jpn-190098-1-at.pdf)
Supplement: jpn-190098-1-at.pdf [file jpn-190098-1-at.pdf]

Appendix 1 to Tang VM, Blumberger DM, Dimitrova J, et al. Magnetic seizure therapy is efficacious and well tolerated for treatment-resistant bipolar depression: an open label clinical trial . *J Psychiatry Neurosci* 2020.  
DOI: 10.1503/jpn.190098

Copyright © 2020 The Author(s) or their employer(s). To receive this resource in an accessible format, please contact us at [cmajgroup@cmaj.ca](mailto:cmajgroup@cmaj.ca).

*Online appendices are unedited and posted as supplied by the authors.*

*Table S1: Means and SD for Neurocognitive Measures in Adequate Trial Completers*

| Variable             | M (SD)  |         |          |         | Z      | P      |
|----------------------|---------|---------|----------|---------|--------|--------|
|                      | Pre-MST |         | Post-MST |         |        |        |
| MoCA                 | 26.76   | (2.61)  | 26.60    | (2.75)  | -0.490 | 0.624  |
| AMI – SF             | 51.68   | (5.88)  | 42.00    | (7.38)  | -4.291 | <0.001 |
| Trails A             | 41.35   | (18.44) | 36.89    | (15.15) | -1.992 | 0.046  |
| Trails B             | 98.29   | (67.58) | 95.44    | (40.75) | -0.438 | 0.661  |
| Symbol Coding        | 49.32   | (14.47) | 49.23    | (14.69) | -0.299 | 0.765  |
| HVLT-R Trial 1       | 6.55    | (2.30)  | 6.41     | (1.71)  | -0.336 | 0.737  |
| HVLT-R Recall        | 8.59    | (3.04)  | 8.82     | (3.19)  | -0.032 | 0.975  |
| HVLT-R Retention     | 84.23   | (16.77) | 82.13    | (18.99) | -0.501 | 0.616  |
| HVLT-R Recognition   | 10.68   | (1.43)  | 10.82    | (1.59)  | -0.690 | 0.490  |
| Spatial Span Forward | 8.87    | (1.63)  | 8.70     | (2.16)  | -0.330 | 0.742  |
| Spatial Span Back    | 7.70    | (2.10)  | 7.57     | (2.33)  | -0.090 | 0.928  |
| LNS                  | 15.67   | (3.34)  | 15.67    | (4.07)  | -0.339 | 0.734  |
| BVMT-R Trial 1       | 6.68    | (2.85)  | 6.27     | (2.64)  | -0.862 | 0.389  |
| BVMT-R Recall        | 9.55    | (2.26)  | 9.59     | (2.54)  | -0.088 | 0.930  |
| BVMT-R Retention     | 94.32   | (11.43) | 93.92    | (13.22) | -0.380 | 0.704  |
| BVMT-R Learning      | 3.45    | (2.40)  | 3.82     | (2.11)  | -0.832 | 0.405  |

Appendix 1 to Tang VM, Blumberger DM, Dimitrova J, et al. Magnetic seizure therapy is efficacious and well tolerated for treatment-resistant bipolar depression: an open label clinical trial . *J Psychiatry Neurosci* 2020.  
DOI: 10.1503/jpn.190098

*Online appendices are unedited and posted as supplied by the authors.*

|                              |        |         |         |         |        |       |
|------------------------------|--------|---------|---------|---------|--------|-------|
| BVMT-R Recognition           | 5.57   | (0.75)  | 5.57    | (0.98)  | -0.306 | 0.760 |
| Mazes                        | 13.86  | (7.65)  | 14.95   | (7.25)  | -1.314 | 0.189 |
| COWAT                        | 40.05  | (16.66) | 38.73   | (16.13) | -0.313 | 0.754 |
| Categories - Animals         | 21.24  | (6.52)  | 21.24   | (6.36)  | -0.349 | 0.727 |
| Stroop Color Score           | 110.91 | (4.49)  | 108.95  | (9.92)  | -1.069 | 0.285 |
| Stroop Color Time            | 61.25  | (13.21) | 66.71   | (16.89) | -1.755 | 0.079 |
| Stroop Color Word Score      | 94.09  | (19.44) | 92.41   | (26.83) | -0.259 | 0.795 |
| Stroop Color Word Score Time | 119.86 | (24.80) | 113.075 | (18.94) | -1.412 | 0.158 |

---

Patients who have completed an adequate trial of MST.

*Note.* MoCA = Montreal Cognitive Assessment; AMI – SF = Autobiographical Memory

Interview-Short Form; Trails A/B = Trail Making Test, Form A or B; Symbol coding = Brief

Assessment of Cognition in Schizophrenia Symbol Coding; HVLN-R = Hopkins Verbal Learning

Test-Revised; Spatial Span = from the Weschler Memory Scale – third edition. LNS = Letter

Number Span; BVMT-R = Brief Visuospatial Memory Test-Revised; Mazes = from the

Neuropsychological Assessment Battery; COWAT = Controlled Oral Word Association Test;

Categories = Category Fluency task, Animals subset. Stroop = Stroop Color-Word Test.

*Online appendices are unedited and posted as supplied by the authors.*

*Table S2: Means and SD for Neurocognitive Measures in Per-Protocol Completers*

| Variable             | M (SD)  |         |          |         | Z      | P      |
|----------------------|---------|---------|----------|---------|--------|--------|
|                      | Pre-MST |         | Post-MST |         |        |        |
| MoCA                 | 27.00   | (2.75)  | 26.89    | (2.54)  | -0.286 | 0.775  |
| AMI – SF             | 50.80   | (5.63)  | 41.75    | (6.91)  | -3.925 | <0.001 |
| Trails A             | 41.41   | (19.42) | 37.38    | (16.17) | -1.643 | 0.100  |
| Trails B             | 100.13  | (72.42) | 96.58    | (43.36) | -0.402 | 0.687  |
| Symbol Coding        | 50.00   | (15.37) | 49.16    | (15.76) | -0.166 | 0.868  |
| HVLT-R Trial 1       | 6.63    | (2.19)  | 6.32     | (1.80)  | -0.922 | 0.356  |
| HVLT-R Recall        | 8.84    | (2.93)  | 8.95     | (3.21)  | -0.398 | 0.690  |
| HVLT-R Retention     | 85.01   | (16.69) | 82.01    | (19.05) | -0.824 | 0.410  |
| HVLT-R Recognition   | 10.79   | (1.23)  | 10.68    | (1.67)  | -0.053 | 0.958  |
| Spatial Span Forward | 8.85    | (1.73)  | 8.75     | (2.29)  | -0.079 | 0.937  |
| Spatial Span Back    | 7.85    | (2.16)  | 7.40     | (2.35)  | -1.041 | 0.298  |
| LNS                  | 15.78   | (3.46)  | 15.72    | (4.27)  | -0.246 | 0.805  |
| BVMT-R Trial 1       | 6.53    | (2.86)  | 6.32     | (2.77)  | -0.430 | 0.667  |
| BVMT-R Recall        | 9.47    | (2.27)  | 9.42     | (2.65)  | -0.284 | 0.776  |
| BVMT-R Retention     | 93.33   | (11.64) | 93.49    | (14.10) | -0.063 | 0.950  |
| BVMT-R Learning      | 3.63    | (2.52)  | 3.63     | (2.19)  | -0.130 | 0.896  |

Appendix 1 to Tang VM, Blumberger DM, Dimitrova J, et al. Magnetic seizure therapy is efficacious and well tolerated for treatment-resistant bipolar depression: an open label clinical trial . *J Psychiatry Neurosci* 2020.  
DOI: 10.1503/jpn.190098

*Online appendices are unedited and posted as supplied by the authors.*

|                              |        |         |        |         |        |       |
|------------------------------|--------|---------|--------|---------|--------|-------|
| BVMT-R Recognition           | 5.61   | (0.70)  | 5.56   | (1.04)  | -0.072 | 0.943 |
| Mazes                        | 14.67  | (7.91)  | 15.78  | (7.50)  | -1.090 | 0.276 |
| COWAT                        | 40.58  | (17.65) | 38.11  | (17.15) | -0.981 | 0.326 |
| Categories - Animals         | 22.28  | (6.25)  | 21.39  | (6.66)  | -0.813 | 0.416 |
| Stroop Color Score           | 110.89 | (4.82)  | 108.47 | (10.63) | -1.342 | 0.180 |
| Stroop Color Time            | 59.35  | (12.34) | 66.22  | (17.93) | -2.112 | 0.035 |
| Stroop Color Word Score      | 95.89  | (18.24) | 91.37  | (27.84) | -0.472 | 0.637 |
| Stroop Color Word Score Time | 117.41 | (24.58) | 110.36 | (18.14) | -1.172 | 0.241 |

---

Patients who have completed the trial of MST per-protocol.

*Note.* MoCA = Montreal Cognitive Assessment; AMI – SF = Autobiographical Memory

Interview-Short Form; Trails A/B = Trail Making Test, Form A or B; Symbol coding = Brief

Assessment of Cognition in Schizophrenia Symbol Coding; HVLN-R = Hopkins Verbal Learning

Test-Revised; Spatial Span = from the Weschler Memory Scale – third edition. LNS = Letter

Number Span; BVMT-R = Brief Visuospatial Memory Test-Revised; Mazes = from the

Neuropsychological Assessment Battery; COWAT = Controlled Oral Word Association Test;

Categories = Category Fluency task, Animals subset. Stroop = Stroop Color-Word Test.
